# Supplementary material for: Type-II ternary Bi2WO6/rGO/SnFe2O4 heterojunction nanocomposites and their photocatalytic efficiency towards 4-nitrophenol reduction
Source: Royal Society of Chemistry journal article supplement (doi:10.1039/d3ra03647b), 2023-01-01
Supplement: d3ra03647b1.pdf [file d3ra03647b1.pdf]

## 1) Tauc plots of synthesised catalysts

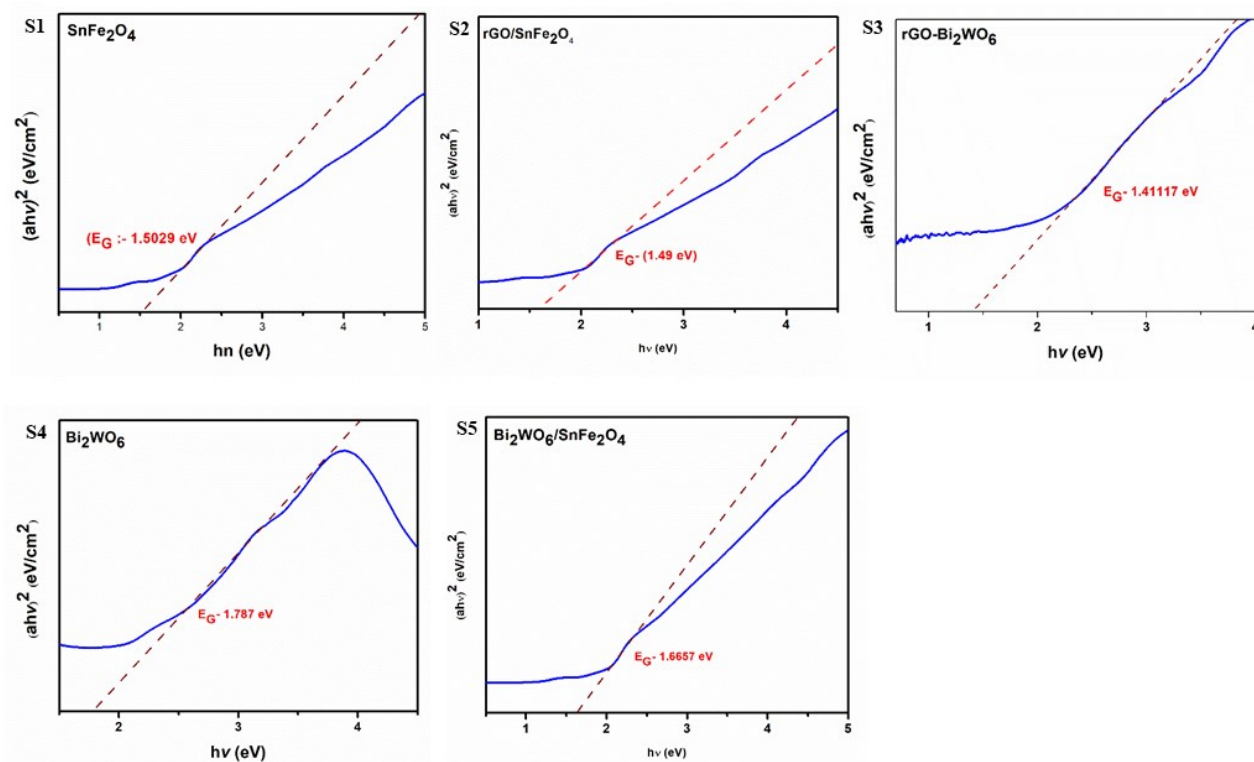

## 2) SEM and EDAX images of Synthesised catalysts

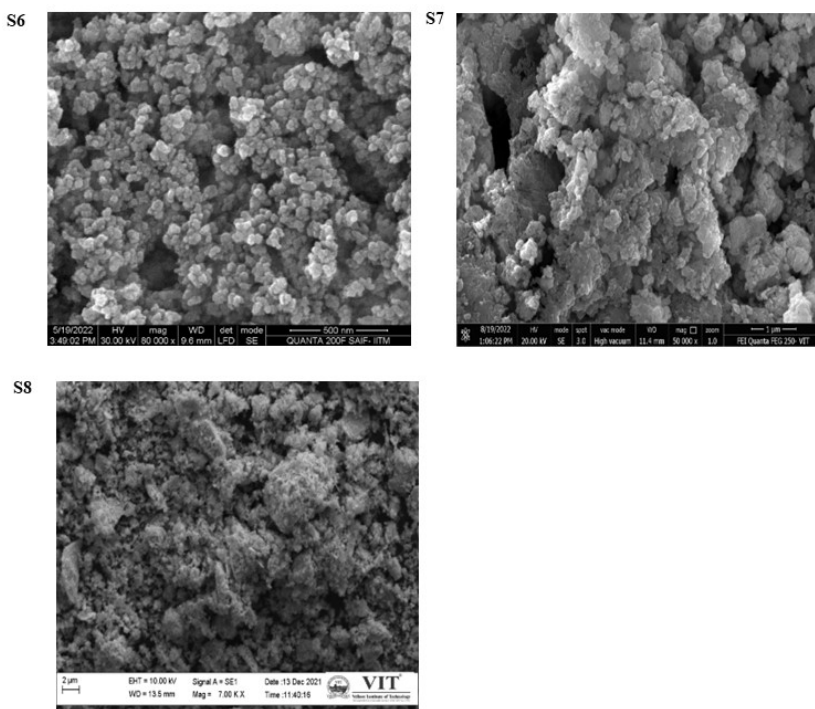

### 3) Thermal studies

S9

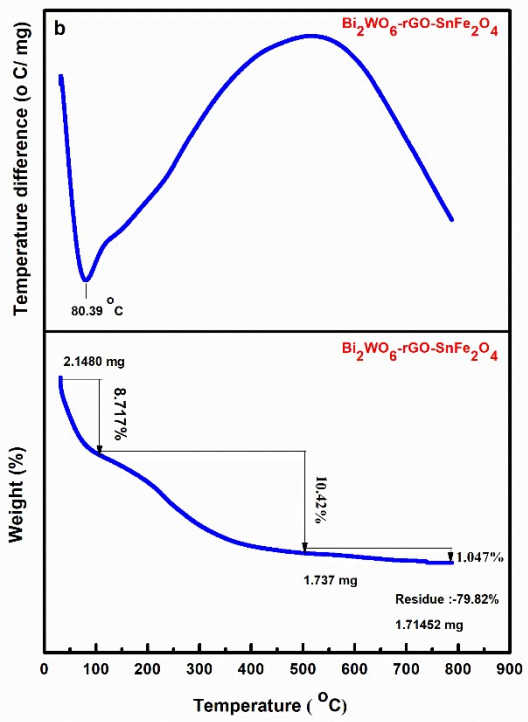

Figure S9 :- DTA plot of  $\text{Bi}_2\text{WO}_6/\text{rGO}/\text{SnFe}_2\text{O}_4$

### 3) Surface area analysis

S10

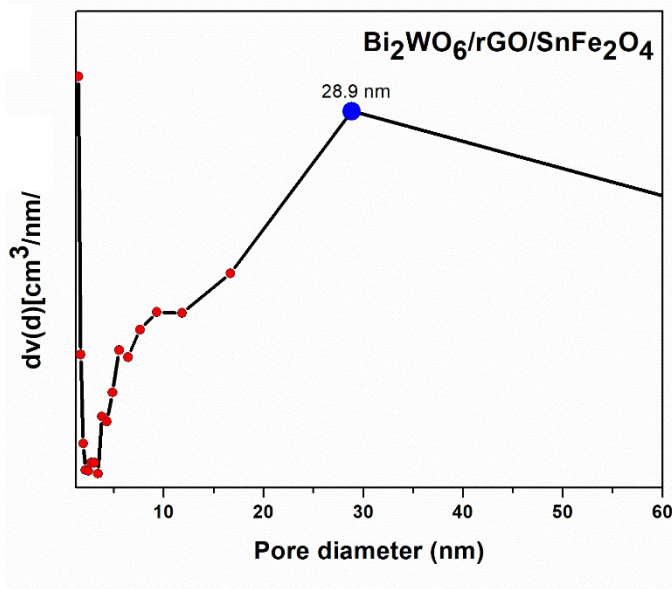

Figure S10 :- Pore size distribution curve of  $\text{Bi}_2\text{WO}_6/\text{rGO}/\text{SnFe}_2\text{O}_4$

#### 4) Photocatalytic reduction studies

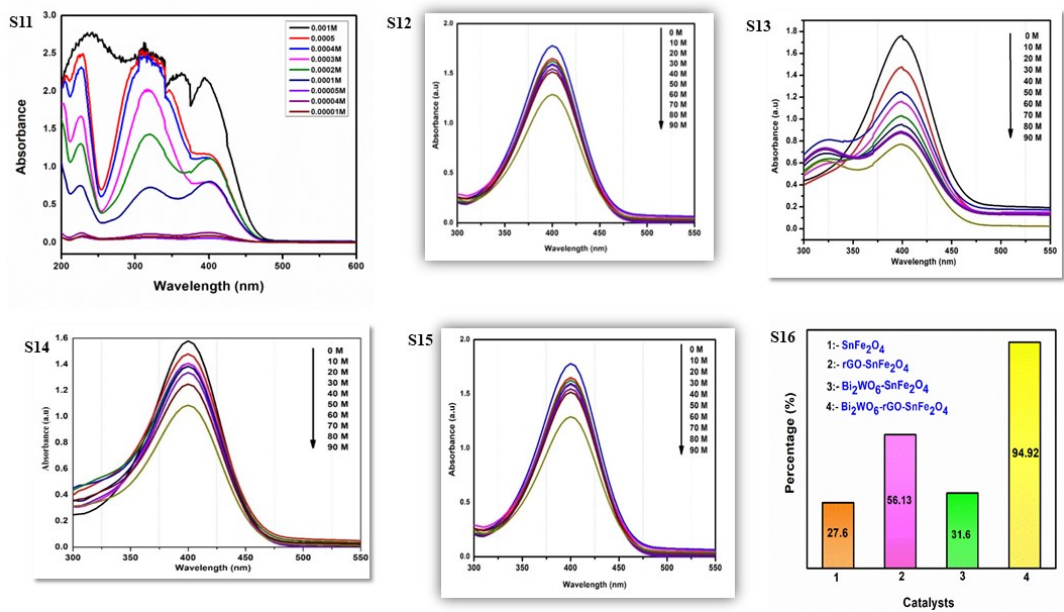

Figure S11- S16: S11) Various concentration plot of 4-NP without catalyst & NaBH<sub>4</sub>, photocatalytic plot of S12) SnFe<sub>2</sub>O<sub>4</sub>, S13) rGO/SnFe<sub>2</sub>O<sub>4</sub>, S14) Bi<sub>2</sub>WO<sub>6</sub>/SnFe<sub>2</sub>O<sub>4</sub> S15) Bi<sub>2</sub>WO<sub>6</sub> & S16) Plot of catalysts versus reduction efficiency percentage

#### 5) Recyclability studies

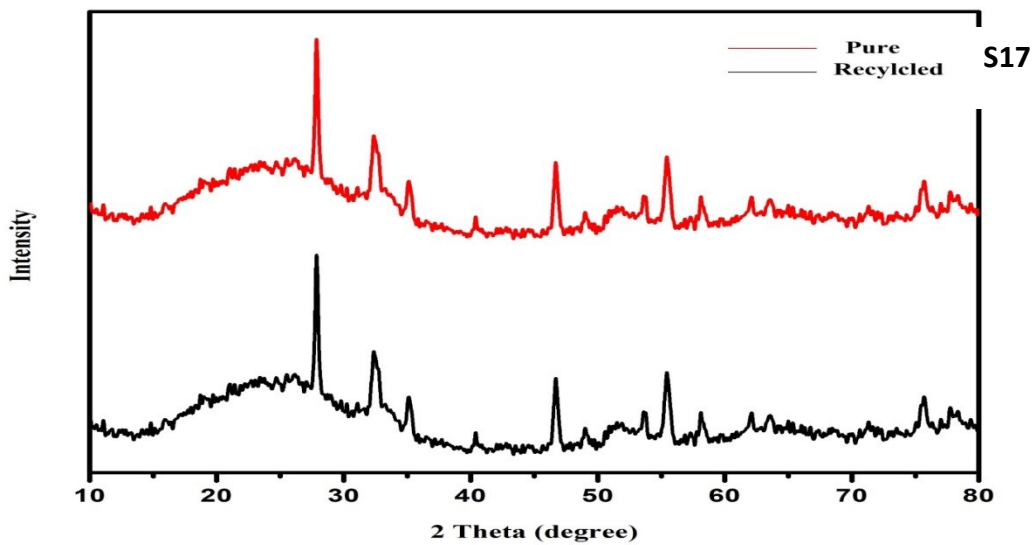

Figure S17:- XRD plot of Bi<sub>2</sub>WO<sub>6</sub>/rGO/SnFe<sub>2</sub>O<sub>4</sub> before (red) and after 6 consecutive cycles (black)

S18

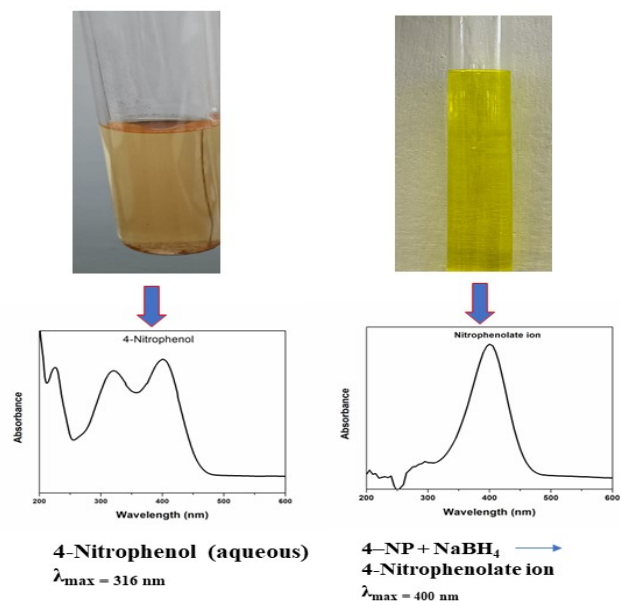

Figure S18: UV-Vis spectra of 4-Nitrophenol aqueous solution and 4-Nitrophenolate ions
